# Supplementary material
Source: PubMed Central journal article supplement (PMC5960287)
Supplement: pnas.201717145SI.pdf [file pnas.201717145SI.pdf]

# Supporting Information

Tejero et al. 10.1073/pnas.1717145115

## Hayonim Cave

Hayonim Cave is situated on the right bank of Wadi Izhar, about 13 km from the Mediterranean coast and 50 m above the present Wadi channel, in the Western Galilee, Israel (1, 2).

**The Faunal Assemblage.** The faunal assemblage was first studied by Davis (3, 4) and later by Rabinovich, emphasizing the human mode of exploitation (5, 6). The distribution of species (NISP layer D4 = 1,479; D3 = 7,012; D1–2 = 5,077) is very similar in all occupation stages, with gazelle (*Gazella gazella*) being the most common species (more than 80% of NISP), followed by Persian fallow deer (*Dama mesopotamica*, 5–6%), while other species—red deer (*Cervus elaphus*), wild goat (*Capra aegagrus*), wild boar (*Sus scrofa*), aurochs (*Bos primigenius*), roe deer (*Capreolus capreolus*) and hartebeest (*Alcelaphus buselaphus*)—are represented by only several bones (5, 6).

Every bone was examined under the microscope, and every surface modification was noted (Figs. S1–S3 and Tables S1 and S2). Indeed, the fine preservation state of the bones and their relative density (more than 2,000 bones/m<sup>3</sup>) permitted a detailed reconstruction of the butchery process at what seems to be a “consumption station” where animal resources were processed and shared among the group members, i.e., a “kitchen midden” (1). It appears that animal-carcass processing was a major activity in the cave during the Aurignacian occupation. Based on the location of the cut marks and their shape, the main activity that took place in situ was disarticulation, followed by some filleting and skinning (5, 6).

**The Flint Assemblage.** There is a great techno-typological similarity among the flint assemblages of the three sublayers of layer D. On the other hand, there is pronounced heterogeneity in the overall typological components of the whole lithic assemblage (1).

Flakes are dominant among the debitage items (including “core trimming elements” and “primary elements”). Within the tool categories the picture is different, and tools were modified on blade/bladelet and on flake blanks equally. The character of the debitage is quite irregular. The number of cores is relatively high. Still, judging from the frequencies and types of debitage items, it seems that a large number of tools were made elsewhere, while some of the items produced at Hayonim were taken away.

The typological aspect shows that the Aurignacian assemblage of Hayonim Cave is dominated by the end-scrapers category. The second large category is the burin group. Together, these two categories constitute more than half of the total number of tools in layer D. Borers and backed pieces are scarce, while denticulates and notches are relatively well represented. The el Wad points are quite scarce, and there is a moderate presence of bladelets and bladelet tools (Dufour bladelets).

Another interesting phenomenon is the high percentage of tools with double patina. It is more pronounced in certain tool-groups, i.e., the end-scrapers, the burins, and the denticulates and notches. Most of the double-patinated artifacts clearly derive from the preceding Mousterian levels exhibiting the Levallois technique characteristics including faceted striking platforms. Most probably these Mousterian items were available on the surface of the cave and the terrace due to the post-Mousterian erosion (see refs. 1 and 7 for more details on the flint assemblage and double patination).

**The Bone and Antler Tools Assemblage.** The bone and antler tool assemblage from Hayonim D is unique in its number of tools and their variety and is comparable only to the assemblages of Manot

and Ksar Akil Caves (8–12). Such diversity calls for a detailed study incorporating new technological observations of the corpus. Indeed, a renewed study of the technology of the Hayonim D assemblage is currently under way. The majority of items are bone awls and antler projectile points. There are also several items, both bone and antler, which were most probably used in indirect percussion (namely as a chisel), as has been demonstrated through both technological and experimental studies (13–15).

The tools made of bone were modified in an expedient way using one simple technique, i.e., scraping. On the other hand, antler was exploited by a combination of techniques, namely a process defined by Averbouh as the “conjugation of several technical gestures, resulting in the use of various techniques with a precise purpose which is, concerning the osseous working, of transforming a raw material bloc into a particular object” (16, p. 55), implying a complex operational sequence.

This typological and technological dichotomy as regards bone and antler items is also observed in the Early Aurignacian of Europe (e.g., refs. 13 and 17–21) as well as in the Levantine Aurignacian assemblage of Manot Cave (12).

Whenever the base of the antler projectile point is preserved, it is a simple/massive point of the variety defined as “elongated objects with a pointed distal tip, a variable cross section (mostly elliptical) and a simple hafting system” (22). The projectile points that characterize the Evolved Aurignacian in Europe and the local Levantine Aurignacian are also known by various other names, including “pointed base points,” “biconical,” “massive base point,” or simply “not split based points” (e.g., ref. 22). We prefer to use the terms “massive base point” or “simple base point,” which relate better to the general morphology of these objects (23). Except for one split-based point from Kebara (24) [see also claims for a second specimen, from Hayonim Cave (25)], all projectile points from the Levantine Aurignacian (ca. 150 specimens so far) are simple/massive points (1, 9, 12, 26, 27). We attributed all broken specimens from Hayonim to this category according to the raw material, the cross-section extension of the worked surface of the object, and the morphometrics of the item. It seems that for all points are made from antler the cross-section is elliptical, the entire piece is worked, and they are fully compatible with the morphometrics of simple/massive points at other Aurignacian sites such as those from Manot Cave and Ksar Akil. The complete points measure 65–70 mm in length, 7–9 mm in width, and 6–8 mm in thickness.

**Other Symbolic Items.** In addition to the notched bones, some other items traditionally linked with the symbolic sphere of Paleolithic hunter-gatherer groups have been recovered from the Aurignacian layers in Hayonim Cave. Five are tooth pendants, one of which is unfinished. The pendants have already been described (1), but the preform (the unfinished piece) was identified only recently among the faunal remains.

The pendants were made from red deer vestigial canines (specimens HD157, HD179, and HD226, the unfinished item), a horse incisor (*Equus* sp.; specimen HD152), and a fox canine (*Vulpes vulpes*; specimen HD258). They were found in layers D1–2 (two items), layer D3, and D4 (one item in each layer) and in D sequence without exact provenience. No obvious spatial distribution in relation to other symbolic items was detected.

Two incised limestone slabs were uncovered in two different locations. The first item was found in D1–2 (square J21), while the second piece came from D4 (square I21) (1).

The incisions on the first object are clearer. One side depicts a linear figure that resembles the back of an ungulate, perhaps a horse, with some indication of a head. The other side of the slab has fewer incisions, hinting at some sort of a figure (an animal back?) in a diagonal direction and a series of descending lines (1).

### The Notched Items of Hayonim D and Other Levantine Sites

Some of the notched gazelle scapulae (5) deriving from Hayonim D have already been published by Davis (28); however, during the revision of the bone and antler worked items from Hayonim D we observed four other notched specimens, i.e., three scapulae and one hyoid. The Levantine Aurignacian record so far comprises 14 items: nine from Hayonim Cave, four from Manot Cave, and one from Kebara. Although the one from Kebara was attributed by Davis to the Mousterian levels, the origin of this item is uncertain. In a recent revision of the archaeological material from Emireh Cave excavated by Turville-Petre and studied by D. Garrod (29), a notched bone was found (30). Emiran, Mousterian, Ahmarian, and Aurignacian occupation is suggested in the new revision of the lithic technology (30). However, the reassessment could not establish a clear stratigraphic sequence. We can assume that the notched piece originates from the Aurignacian occupation (Table S3).

### Spatial Distribution of the Notched Items

The notched items are from the entire stratum of the Aurignacian occupation (D layers). Six pieces derive from layer D1–2, two from layer D3, and one from layer D (Fig. S4 and Table 1).

No particular spatial association is shown between the notched items and other nonlithic artifacts (pendants, ochre fragments, incised limestone slabs) or structures (namely hearths). Thus, of the five Aurignacian pendants made of teeth, only two (a horse incisor, HD152, and a fox canine, HD258) were found in the same square (I22a) at a similar depth with the notched hyoid (Fig. S4).

In D1–2, isolated patches of white ash suggested that, somewhere not far away, there was a fireplace (1). One of the scapulae comes from square H21, where there is clearly a hearth. Two notched specimens display marks of having been subjected to a combustion process. The surface of these specimens was burned, showing a homogenous color and patina (dark brown and soft brown, respectively). Since the pieces are broken and do not have a stratigraphic connection with combustion structures, it is not possible to speculate about the purpose (if any) of the thermic process. Alternatively, it could be merely incidental (e.g., broken pieces discarded into a fire).

It has been suggested that the archaeological occupations at Hayonim D could be reconstructed as a series of short but intensive sequences of occupations resulting in kitchen midden depositions. Therefore, the lack of precise association between the symbolic and other items might result from the continued tossing of debris at the same place during several occupation stages. Indeed, the repeated processing of meat and bone precludes the reconstruction of when and what was the role played by the symbolic items, but they clearly were part and parcel of the Aurignacian existence at the site.

### Further Discussion of Notched Bone Significance in the Levantine Aurignacian

The emergence and diffusion of the Upper Paleolithic typo-technical traditions is among the most debated topics following the dispersal of AMH in Eurasia. It seems essential to examine and evaluate the variability among human groups when discussing the success and failure of this dispersal across new lands and the establishment of

regional territories (31). Human groups differ (32, 33), not only because of different external environmental circumstances (34) but also because of intragroup social rules, customs, and relationships (35). Thus, the variability observed in ritual and symbolic behavior undoubtedly played an important role and is a crucial aspect when researching Pleistocene groups and/or cultures. Beyond the technological skills, the variability in social and spiritual dynamics lies at the core of human self-definition as a group, society, or culture (31).

A key feature of the use of symbols is that their meaning is assigned by arbitrary, socially constructed conventions, allowing the storage and visualization of information external to the human brain (e.g., refs. 36–38). The objects impregnated with a symbolic meaning reflect the use of the symbolic concepts to link the individual or population with their material culture and their environment (36).

As pointed out by Wobst (39), one aspect of symbolic material culture, and possibly the most significant benefit of symbolical behavior in general, is its ability to link the individual or group with other individuals and groups through the inter- and intragroup transmission of information. The use of artifacts to transmit messages is advantageous when used to communicate information to people who are in “the middle distance,” that is, those people who are not so close to the sender that the messages are already known and not so distant that the meaning of the message cannot be deciphered (neighboring groups or other members of an alliance) (38–41). Such signals thus may include identification (class affinity, social group affiliation, rank, and so forth), authorship, and ownership. Temporal and spatial patterns of the symbolic material can be used to examine the volume and diversity of information flow within and between regions during the Paleolithic (Fig. S5) (38, 42–47).

In the absence of any functional purpose of the notched items, we suggest their use as distinctive personal objects attached to clothes or as pendants. Personal ornaments can be necklaces, pendants, or dress decorations (48). While the precise meaning of the message transmitted by such objects is lost to us, we can nevertheless assess its significance in a particular regional context. In this regard, it is interesting to note that, as in the Levantine Aurignacian, in other regions and material cultures a few specific types of raw materials with standardized shape were selected as personal ornaments. Examples are the selection of particular shell genus—*Nassarius*—to fabricate pendants from the African MSA to the beginning of the UP in both the Levant and Europe (48–51) and the particular shape of the so-called “basket beads” made mostly of ivory, characteristic of the Early Aurignacian in southwest France (45, 52, 53).

In the Levantine Aurignacian we witness the usage of a common available raw material but with a definite aim to create the desired shape. The technology applied, i.e., scraping bone surface and creating sawing-like marks, is not an innovation. The repetition is what suggests that the final use was the goal of the fabrication, and here we can only speculate. The regional variants of the graphic expressions of the Aurignacian could be rooted in the Paleolithic entities present in Eurasia before the arrival of the Aurignacian or could be linked with the dispersion of AMH groups across Eurasia (e.g., refs. 54–58). As pointed out by Bourrillon and colleagues (47), this pattern of regional variability matches the social geography models which focus on the material construction of identity at regional, group, and individual levels (38, 39, 43) that is expressed in personal ornaments and also in rock and mobile art, bone and antler industries, and lithic technology (e.g., refs. 12, 17, 42, 45, and 59–64). This could perhaps explain the differences in the graphic organization between the Levantine and the European Aurignacian varieties.

1. Belfer-Cohen A, Bar-Yosef O (1981) The Aurignacian at Hayonim Cave. *Paéorient* 7: 19–42.
2. Bar-Yosef O, et al. (2017) Hayonim Cave. *Quaternary of the Levant. Environments, Climate Change, and Humans*, eds Enzel Y, Bar-Yosef O (Cambridge Univ Press, Cambridge, UK), pp 231–240.

3. Davis SJ-M (1981) The effects of temperature change and domestication on the body size of Late Pleistocene to Holocene mammals of Israel. *Paleobiology* 7:101–114.
4. Davis SJ-M (1982) Climate change and the advent of domestication: The succession of ruminant artiodactyls in the Late Pleistocene-Holocene period in the Israel region. *Paéorient* 8:25–165.

5. Rabinovich R (1998) "Drowning in numbers"—Gazelles dominance and body size groups in archaeological record. *Archaeozoology of the Near East*, eds Buitenhuis H, Bartosiewicz L, Choyke AM (ARC-Publicaties, Budapest), pp 45–71.
6. Rabinovich R, Bar-Yosef O, Tchernov E (1997) "How many ways to skin a gazelle"—Butchery patterns from an Upper Palaeolithic site, Hayonim Cave, Israel. *Archaeozoologia* 8:11–52.
7. Belfer-Cohen A, Bar-Yosef O (2015) Paleolithic recycling: The example of Aurignacian artifacts from Kebara and Hayonim caves. *Quat Int* 361:256–259.
8. Newcomer MH (1974) Outils en os du Paléolithique supérieur de Ksar Akil (Liban). *Tér. Colloque International sur l'Industrie de l'Os dans la Préhistoire: Abbaye de Sénanque, 18–20 Avril 1974*, ed Camps Fabrer H (Éditions de l'Université de Provence, Aix-en-Provence, France), pp 60–65.
9. Bergman C-A (1987) Hafting and use of bone and antler points from Ksar Akil, Lebanon. *La Main et l'Outil. Manches et Emmenchements Préhistoriques*, ed Stordeur D (Travaux de la Maison de l'Orient, Lyon, France), pp 117–126.
10. Marder O, et al. (2013) The Upper Paleolithic of Manot Cave, Western Galilee, Israel: The 2011–12 excavations. *Antiquity* 87.
11. Marder O, Hershkovitz I, Barzilai O (2017) The Early Upper Palaeolithic of Manot Cave, Western Galilee chrono-cultural, subsistence, and palaeo-environmental reconstruction. *Quaternary of the Levant. Environments, Climate Change, and Humans*, eds Enzel Y, Bar-Yosef O (Cambridge Univ Press, Cambridge, UK), pp 277–284.
12. Tejero J-M, et al. (2016) The osseous industry from Manot Cave (Western Galilee, Israel): Technical and conceptual behaviours of bone and antler exploitation in the Levantine Aurignacian. *Quat Int* 403:90–106.
13. Tartar E (2009) *De l'Os à l'Outil—Caractérisation Technique, Économique et Sociale de l'Utilisation de l'Os à l'Aurignacien Ancien. Étude de Trois Sites: L'Abri Castanet (Secteurs Nord et Sud), Brasempouy (Grotte des Hyènes et Abri Dubalen) et Gatzarria*. PhD dissertation (Université Paris I Panthéon-Sorbonne, Paris).
14. Tartar E (2012) The recognition of a new type of bone tools in Early Aurignacian assemblages: Implications for understanding the appearance of osseous technology in Europe. *J Archaeol Sci* 39:2348–2360.
15. Tejero J-M, Christensen M, Bodu P (2012) Red deer antler technology and early modern humans in Southeast Europe: An experimental study. *J Archaeol Sci* 39:332–346.
16. Averbouch A (2000) *Technologie de la Matière Osseuse Travillée et Implications Paléthnologiques. L'Exemple des Chaines d'Exploitation du Bois de Cérvide chez les Magdaléniens des Pyrénées*. PhD Dissertation (Université Paris I Panthéon-Sorbonne, Paris).
17. Liolios D (1999) *Variabilité et Caractéristiques du Travail des Matières Osseuses au Début de l'Aurignacien: Approche Technologique et Économique*. PhD dissertation (Paris X Nanterre University, Nanterre, France).
18. Tartar E, White R (2013) The manufacture of Aurignacian split-based points: An experimental challenge. *J Archaeol Sci* 40:2723–2745.
19. Tejero J-M (2013) *La Explotación de las Materias Oseas en el Auriñaciense. Caracterización Tecnocómica de las Producciones del Paleolítico Superior Inicial en la Península Ibérica*, British Archaeological Reports. International Series (Archaeopress, Oxford), Vol 2469.
20. Tejero J-M (2014) Towards complexity in osseous raw material exploitation by the first anatomical modern humans in Europe: Aurignacian deer antler work. *J Anthropol Archaeol* 36:72–92.
21. Tejero J-M, Grimaldi S (2015) Assessing bone and antler exploitation at Riparo Mochi (Balzi Rossi, Italy): Implications for the characterization of the Aurignacian in Southwestern Europe. *J Archaeol Sci* 61:59–77.
22. Hahn J (1988) *Fiche Sagaie à Base Fenêe. Fiches Typologiques de l'Industrie Osseuse Préhistorique. Cahier I. Sagaies. Commission de Nomenclature sur l'Industrie de l'Os Préhistorique*, eds Delporte H, Hahn J, Mons L, Pinçon D, Sonnevile-Bordes D (Université de Provence, Aix-en-Provence, France), pp 1–21.
23. Tejero J-M (2016) Spanish Aurignacian projectile points. An example of the first European Palaeolithic hunting weapons in osseous material. *Osseous Projectile Weaponry: Towards an Understanding of Pleistocene Cultural Variability*, ed Langley M (Springer, Dordrecht, The Netherlands), pp 55–69.
24. Bar-Yosef O, et al. (1992) The excavations in Kebara Cave, Mt. Carmel. *Curr Anthropol* 33:497–550.
25. Belfer-Cohen A, Goring-Morris N (2014) The Upper Palaeolithic and Earlier Epipalaeolithic of Western Asia. *The Cambridge World Prehistory*, eds Renfrew AC, Bahn P (Cambridge Univ Press, Cambridge, UK), Vol 3, pp 1381–1407.
26. Gilead I (1991) The Upper Paleolithic period in the Levant. *J World Prehist* 5:105–154.
27. Shimmelitz R, et al. (2018) The Upper Paleolithic and Epipaleolithic of Sefunim Cave, Israel. *Quat Int* 464:106–125.
28. Davis SJ-M (1974) Incised bones from the Mousterian of Kebara cave (Mount Carmel) and the Aurignacian of Ha-Yonim cave (Western Galilee), Israel. *Paëorient* 2:181–182.
29. Garrod DAE (1955) The Mugharet el Emireh in Lower Galilee: Type station of the Emiran Industry. *J R Anthropol Inst* 85:141–162.
30. Barzilai O, Gubenko N (2018) Rethinking Emireh Cave: The lithic technology perspectives. *Quat Int* 464:92–105.
31. Bar-Yosef O, Belfer-Cohen A (2013) Following Pleistocene road signs of human dispersals across Eurasia. *Quat Int* 285:30–43.
32. Binford LR (2001) *Constructing Frames of Reference: An Analytical Method for Archaeological Theory Building Using Ethnographic and Environmental Data Sets* (Univ of California Press, Berkeley, CA).
33. Norenzayan A (2011) Behavior. Explaining human behavioral diversity. *Science* 332:1041–1042.
34. Banks WE, d'Errico F, Zilhão J (2013) Human-climate interaction during the Early Upper Paleolithic: Testing the hypothesis of an adaptive shift between the Proto-Aurignacian and the Early Aurignacian. *J Hum Evol* 64:39–55.
35. Gelfand MJ, et al. (2011) Differences between tight and loose cultures: A 33-nation study. *Science* 332:1100–1104.
36. Henshilwood C, Marean CW (2003) The origin of modern human behaviour: Critique of the models and their test implications. *Curr Anthropol* 44:627–665.
37. Hovers E, Ilani S, Bar-Yosef O, Vandermeersch B (2003) An early case of color symbolism: Ochre use by modern humans in Qafzeh Cave. *Curr Anthropol* 44:491–522.
38. Langley MC (2015) Symbolic material culture in the Late Pleistocene: Use in pre-history, appearance in the archaeological record and taphonomy. *The Genesis of Creativity and the Origin of the Human Mind*, eds Putovà B, Václav S (Karolinum; Charles University, Prague, Czech Republic), pp 57–75.
39. Wobst HM (1977) Stylistic behavior and information exchange. *For the Director: Research Essays in Honor of James B. Griffin*, ed Charles EC (Museum of Anthropology, University of Michigan, Ann Arbor, MI), pp 317–342.
40. Tostevin G (2007) Social intimacy, artefact visibility and acculturation models of Neanderthal–Modern human interaction. *Rethinking the Human Revolution: New Behavioural and Biological Perspectives on the Origin and Dispersal of Modern Humans*, eds Mellars P, Boyle P, Bar-Yosef O, Stringer CB (McDonald Institute, Cambridge, UK), pp 341–357.
41. Langley MC (2013) Storied landscapes makes us (modern) human: Landscape socialisation in the Palaeolithic and consequences for the archaeological record. *J Anthropol Archaeol* 32:614–629.
42. Banh PG (1982) Inter-site and inter-regional links during the Upper Paleolithic: The Pyrenean evidence. *Oxf J Archaeol* 1:247–268.
43. Conkey M (1980) *Context, Structure, and Efficacy in Paleolithic Art and Design. Symbols as Sense*, eds Foster ML, Brandes SH (Academic, New York), pp 225–248.
44. White R (1989) Production complexity and standardisation in Early Aurignacian bead and pendant manufacture: Evolutionary implications. *The Human Revolution: Behavioural and Biological Perspectives on the Origins of Modern Humans*, eds Mellars P, Stringer C (Edinburgh Univ Press, Edinburgh), pp 366–390.
45. White R (2007) Systems of personal ornamentation in the Early Upper Palaeolithic: Methodological challenges and new observations. *Rethinking the Human Revolution: New Behavioural and Biological Perspectives on the Origin and Dispersal of Modern Humans*, eds Mellars P, Boyle P, Bar-Yosef O, Stringer CB (McDonald Institute, Cambridge, UK), pp 287–302.
46. Vanhaeren M, d'Errico F (2006) Aurignacian ethno-linguistic geography of Europe revealed by personal ornaments. *J Archaeol Sci* 33:1105–1128.
47. Bourrillon R, et al. (2017) A new Aurignacian engraving from Abri Blanchard, France: Implications for understanding Aurignacian graphic expression in Western and Central Europe. *Quat Int*, 10.1016/j.quaint.2016.09.063.
48. Kuhn S, Stiner MC (2007) Body ornamentation as information technology: Towards an understanding of the significance of early bead. *Rethinking the Human Revolution: New Behavioural and Biological Perspectives on the Origin and Dispersal of Modern Humans*, eds Mellars P, Boyle P, Bar-Yosef O, Stringer CB (McDonald Institute, Cambridge, UK), pp 45–54.
49. Stiner MC (2003) "Standardization" in Upper Paleolithic ornaments at the coastal sites of Riparo Mochi and Uçaizli Cave. *The Chronology of the Aurignacian and the Transitional Technocomplexes. Dating, Stratigraphies, Cultural Implications*, eds Zilhão J, d'Errico F (Instituto Português de Arqueologia, Lisboa, Portugal), pp 49–59.
50. Taborin Y (2004) *Langage sans paroles. La Parure aux Temps Préhistoriques* (La Maison des Roches, Paris).
51. Bar-Yosef Mayer DE (2015) Nassarius shells: Preferred beads of the Palaeolithic. *Quat Int* 390:79–84.
52. White R (1992) Rethinking the Middle/Upper Paleolithic transition. *Curr Anthropol* 33:85–108.
53. Heckel CE (2017) Reconsidering production organization in the Early Upper Palaeolithic: The case for specialized production of Aurignacian beads. *Quat Int*, 10.1016/j.quaint.2017.02.002.
54. Bar Yosef O (2006) Le cadre archéologique de la révolution du Paléolithique supérieur. *Naissance de la Pensée Symbolique et du Langage* (Presses Universitaires de France, Paris), pp 3–23.
55. Slimak L, Pesse D, Giraud Y (2006) Reconnaissance d'une installation du Protoaurignacien en vallée du Rhône. Implications sur nos connaissances concernant les premiers hommes modernes en France méditerranéenne. *C R Palevol* 5:909–917.
56. Teyssandier N (2007) *En Route vers l'Ouest. Les Débuts de l'Aurignacien en Europe*, British Archaeological Reports. International Series (Oxbow Books, Oxford), Vol 1638.
57. Conard NJ, Bolus M (2003) Radiocarbon dating the appearance of modern humans and timing of cultural innovations in Europe: New results and new challenges. *J Hum Evol* 44:331–371.
58. Tsanova T, et al. (2012) Le plus petit dénominateur commun: Réflexion sur la variabilité des ensembles lamellaires du Paléolithique supérieur ancien d'Eurasie. Un bilan autour des exemples de Kozarnika (Est des Balkans) et Yafteh (Zagros central). *Anthropologie* 116:469–509.
59. Bar-Yosef O, Belfer-Cohen A (1996) Another look at the Levantine Aurignacian. *Proceedings of the XIII Congress of the UISPP, The Upper Palaeolithic*, eds Palma di Cesnola A, Montet-White A, Valoch A (A.B.A.C.O Edizioni, Forli, Italy), Vol 6, pp 139–150.
60. Bar-Yosef O, Belfer-Cohen A (2010) The Levantine Upper Palaeolithic and Epipalaeolithic. *South-Eastern Mediterranean Peoples Between 130,000 and 10,000 Years Ago*, ed Garcea E (Oxbow Books, Oxford), pp 144–167.
61. Belfer-Cohen A, Goring-Morris N (2007) From the beginning: Levantine Upper Palaeolithic cultural changes and continuity. *Rethinking the Human Evolution*, eds Mellars P, Boyle K, Bar-Yosef O, Stringer C (McDonald Institute, Cambridge, UK), pp 199–206.
62. Conard NJ (2003) Palaeolithic ivory sculptures from southwestern Germany and the origins of figurative art. *Nature* 426:830–832.



63. Tartar E (2015) Aurignacian osseous technology: A review of past beliefs and current knowledge (with data from French sites). *Aurignacian Genius: Art, Technology and Society of the First Modern Humans in Europe*, eds White R, Bourrillon R (New York University, New York), pp 34–55.

64. Goutas N, Tejero J-M (2016) Osseous technology as a reflection of chronological, economic and sociological aspects of Palaeolithic hunter-gatherers: Examples from key Aurignacian and Gravettian sites in South-West Europe. *Quat Int* 403:79–89.

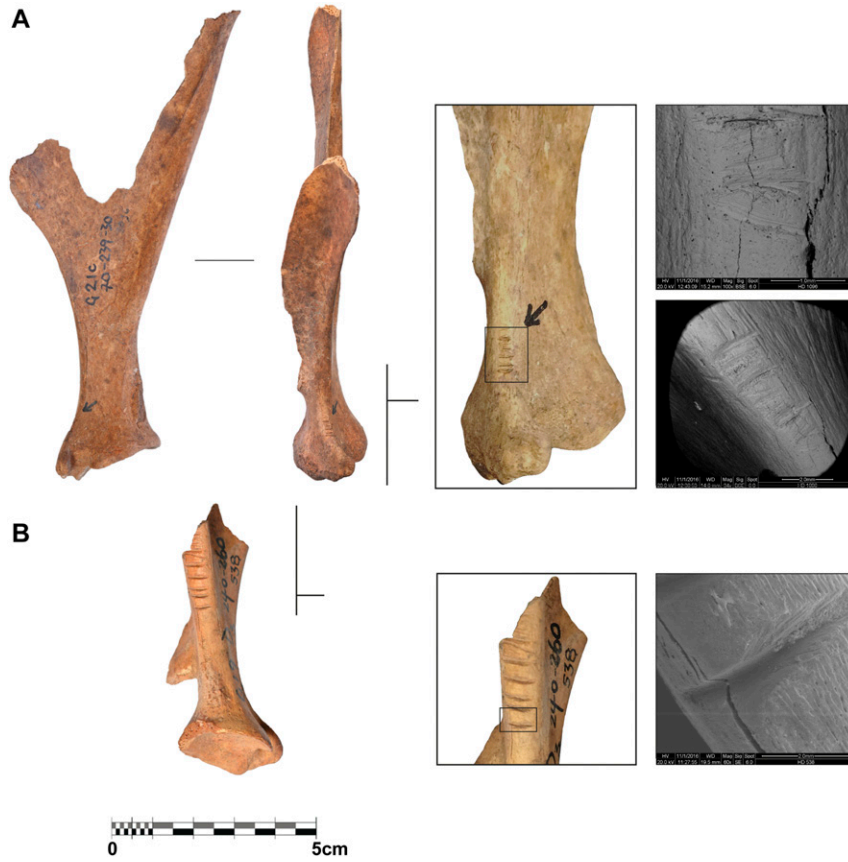

Fig. 51. (A) Scapula displaying cut marks (HD1096). (B) A notched scapula fragment (R538). Magnifications in scanning electron microscopy images: 100x, 34x, and 60x, respectively, from top to bottom. Image courtesy of Assaf Uzan (photographer).

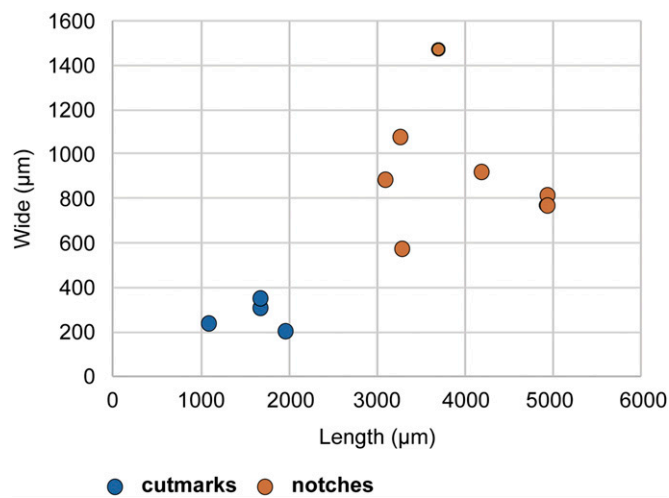

Fig. 52. Morphometrics (length vs. width in micrometers) of cut marks and notches.







**Table S1. Technological description of the Hayonim D notched bones**

| Specimen ID | Number of notches | Location of notches                       | Surface preparation technique | Area covered by scraping, mm | Notch technique | Area covered by notches, mm | Length of notches, mm | Distance between notches, mm | Notch cross-section |
|-------------|-------------------|-------------------------------------------|-------------------------------|------------------------------|-----------------|-----------------------------|-----------------------|------------------------------|---------------------|
| 10,110      | 3*                | Border                                    | —                             |                              | Sawing          | 12                          | 0.5                   | 1–2                          | V                   |
| HD231       | 7                 | Posterior border                          | Scraping                      | 18                           | Sawing          | 18                          | 3–4                   | 1.5–3                        | V                   |
| HD537       | 16                | Posterior border medial aspect            | Scraping                      | 44                           | Sawing          | 44                          | 5                     | 1.5–5                        | V                   |
| R538        | 6                 | Posterior border                          | Scraping                      | 22                           | Sawing          | 18                          | 5                     | 1–2                          | V                   |
| R539        | 6                 | Posterior border costal end               | Scraping                      | 39                           | Sawing          | 52                          | 3                     | 2–7                          | V                   |
| HD540       | 6                 | Posterior border costal aspect            | Scraping                      | 11                           | Sawing          | 11                          | ca. 4                 | 0.5–1.5                      | V                   |
| HD541       | 3                 | Posterior border                          | Scraping                      | 16                           | Sawing          | 16                          | 4–5                   | 5                            | V                   |
| R7049       | 3                 | Posterior border near the posterior angle | Scraping                      | 27                           | Sawing          | 13                          | 3.5–4                 | 3–6                          | V                   |
| R7053       | 32                | Posterior border medial aspect            | Scraping                      | 32                           | sawing          | 32                          | 2.5–3                 | 0.5–1                        | V                   |

\*The third notch was not complete.

**Table S2. Morphometrics of cut marks (specimen HD1096) and notched scapulae (R538, HD231, and R539)**

| Specimen ID | Marks     | Length, $\mu\text{m}$ | Width, $\mu\text{m}$ |
|-------------|-----------|-----------------------|----------------------|
| HD1096      | Cut marks | 1,977.3               | 203.57               |
|             |           | 1,699.42              | 309.61               |
|             |           | 1,695.4               | 347.75               |
|             |           | 1,093.3               | 237.5                |
| R538        | Notches   | 4,193.18              | 554.5                |
|             |           | 4,103.54              | 616.45               |
|             |           | 4,957.45              | 814.1                |
|             |           | 4,939.2               | 765.74               |
| HD231       | Notches   | 3,107.5               | 876.68               |
|             |           | 4,208.52              | 921.44               |
|             |           | 3,058.37              | 494.95               |
|             |           | 4,037.28              | 747.68               |
| R539        | Notches   | 3,112.2               | 976.78               |
|             |           | 3,309.1               | 568.66               |
|             |           | 3,700.78              | 1,469.05             |
|             |           | 3,289.7               | 1,068.87             |
